# Supplementary material
Source: ML conference proceedings conference paper supplement (https://www.ecva.net/papers/eccv_2022/papers_ECCV/html/136650526_ECCV_2022_paper.php)
Supplement: Supplementary file 1 [file 136650526-supp.zip]

# Supplementary Material for Identity-Aware Hand Mesh Estimation and Personalization from RGB Images

Anonymous ECCV submission

Paper ID 1076

## 1 Introduction

In this supplementary document, we mainly cover the following topics.

- Cross-validation experiments on the DexYCB dataset.
- Additional ablation study.
- Additional qualitative results of our proposed personalization method from only RGB images.

## 2 Cross-Validation on DexYCB

Table 1: Cross-validation experiments on DexYCB. Three-fold cross-validation is performed.

| Method                                 | Split-A<br>$\{\star\}/\{7\}/\{8, 9\}$ |       | Split-B<br>$\{\star\}/\{3\}/\{0, 2\}$ |       | Split-C<br>$\{\star\}/\{10\}/\{5, 6\}$ |       | Average      |              |
|----------------------------------------|---------------------------------------|-------|---------------------------------------|-------|----------------------------------------|-------|--------------|--------------|
|                                        | MPJPE                                 | MPVPE | MPJPE                                 | MPVPE | MPJPE                                  | MPVPE | MPJPE ↓      | MPVPE ↓      |
| Chen <i>et al</i> [2], CMR-PG          | 20.34                                 | 19.88 | 17.77                                 | 17.30 | 13.50                                  | 13.09 | <b>17.20</b> | <b>16.76</b> |
| Without Optimization at Inference Time |                                       |       |                                       |       |                                        |       |              |              |
| Baseline                               | 21.58                                 | 20.95 | 17.84                                 | 17.33 | 14.01                                  | 13.59 | 17.81        | 17.29        |
| Ours, GT Shape                         | 18.83                                 | 18.27 | 16.34                                 | 15.86 | 13.11                                  | 12.62 | 16.09        | 15.58        |
| Ours, Calibrated                       | 18.97                                 | 18.42 | 16.98                                 | 16.51 | 13.11                                  | 12.66 | 16.35        | 15.86        |
| With Optimization at Inference Time    |                                       |       |                                       |       |                                        |       |              |              |
| Baseline                               | 18.03                                 | 17.92 | 15.93                                 | 15.72 | 11.75                                  | 11.88 | 15.24        | 15.17        |
| Ours, GT Shape                         | 16.60                                 | 16.29 | 14.63                                 | 14.34 | 11.18                                  | 10.90 | 14.14        | 13.84        |
| Ours, Calibrated                       | 16.81                                 | 16.55 | 15.48                                 | 15.34 | 11.18                                  | 11.13 | <b>14.49</b> | <b>14.34</b> |

Since the DexYCB dataset only contains 10 subjects, we further conduct cross-validation experiments to verify that our model can consistently improve the baseline and outperform the current state-of-the-art method CMR-PG [2]. Experiments are performed on three splits, and results are reported in Table. 1. Split-A refers to the original split across subjects in [1]. In split-A, subject-7 is

in validation set, subject-8 and subject-9 are in test set, while all other seven subjects are allocated to the training set. We denote split-A as  $\{\star\}/\{7\}/\{8, 9\}$ . The right column of Table. 1 reports the average performance of these cross-validation experiments.

### 3 Additional Ablation Studies

Table 2: Ablation study of the proposed method on DexYCB dataset. “GT” is short for ground truth. With GT hand shape, our identity-aware model takes in the GT hand shape parameters. Without GT hand shape, our model takes in the calibrated hand shape parameters which are obtained through our proposed personalization pipeline.

| Methods                                |               |                  |                   | MJPE↓        |
|----------------------------------------|---------------|------------------|-------------------|--------------|
| Without Optimization at Inference Time |               |                  |                   |              |
| Baseline                               |               |                  |                   | 21.58        |
| GT hand shape                          |               |                  |                   |              |
| Ours                                   | ✓             |                  |                   | 18.83        |
|                                        | ✗             |                  |                   | 18.97        |
| With Optimization at Inference Time    |               |                  |                   |              |
| Baseline                               |               |                  |                   | 18.03        |
|                                        | GT hand shape | GT root position | GT 2D Predictions |              |
| Ours                                   | ✓             | ✓                | ✓                 | 2.66         |
|                                        | ✓             | ✗                | ✓                 | 7.88         |
|                                        | ✓             | ✓                | ✗                 | 13.85        |
|                                        | ✓             | ✗                | ✗                 | 16.60        |
|                                        | ✗             | ✗                | ✗                 | <b>16.81</b> |

### 4 Qualitative Results of our personalization pipeline.

We further provide the comparison of the calibrated hand mesh versus the ground truth hand mesh for all the subjects in the test set. Note that all these test subjects are *not* seen in the training set. For each subject, please refer to the PNG image named as `$dataset.$subjectID_gt_and_calibrated.png` under the folder `calibrated_versus_ground_truth_hand_meshes`.

### References

1. Chao, Y.W., Yang, W., Xiang, Y., Molchanov, P., Handa, A., Tremblay, J., Narang, Y.S., Van Wyk, K., Iqbal, U., Birchfield, S., et al.: Dexycb: A benchmark for cap-

- turing hand grasping of objects. In: Proceedings of the IEEE/CVF Conference on Computer Vision and Pattern Recognition. pp. 9044–9053 (2021)
2. Chen, X., Liu, Y., Ma, C., Chang, J., Wang, H., Chen, T., Guo, X., Wan, P., Zheng, W.: Camera-space hand mesh recovery via semantic aggregation and adaptive 2d-1d registration. In: Proceedings of the IEEE/CVF Conference on Computer Vision and Pattern Recognition. pp. 13274–13283 (2021)
